# Supplementary material for: Microbes on a Bottle: Substrate, Season and Geography Influence Community Composition of Microbes Colonizing Marine Plastic Debris
Source: PubMed Central journal article supplement (PMC4972250; doi:10.1371/journal.pone.0159289), 2016-08-03

*Spring*

 **PET**

 **Glass**

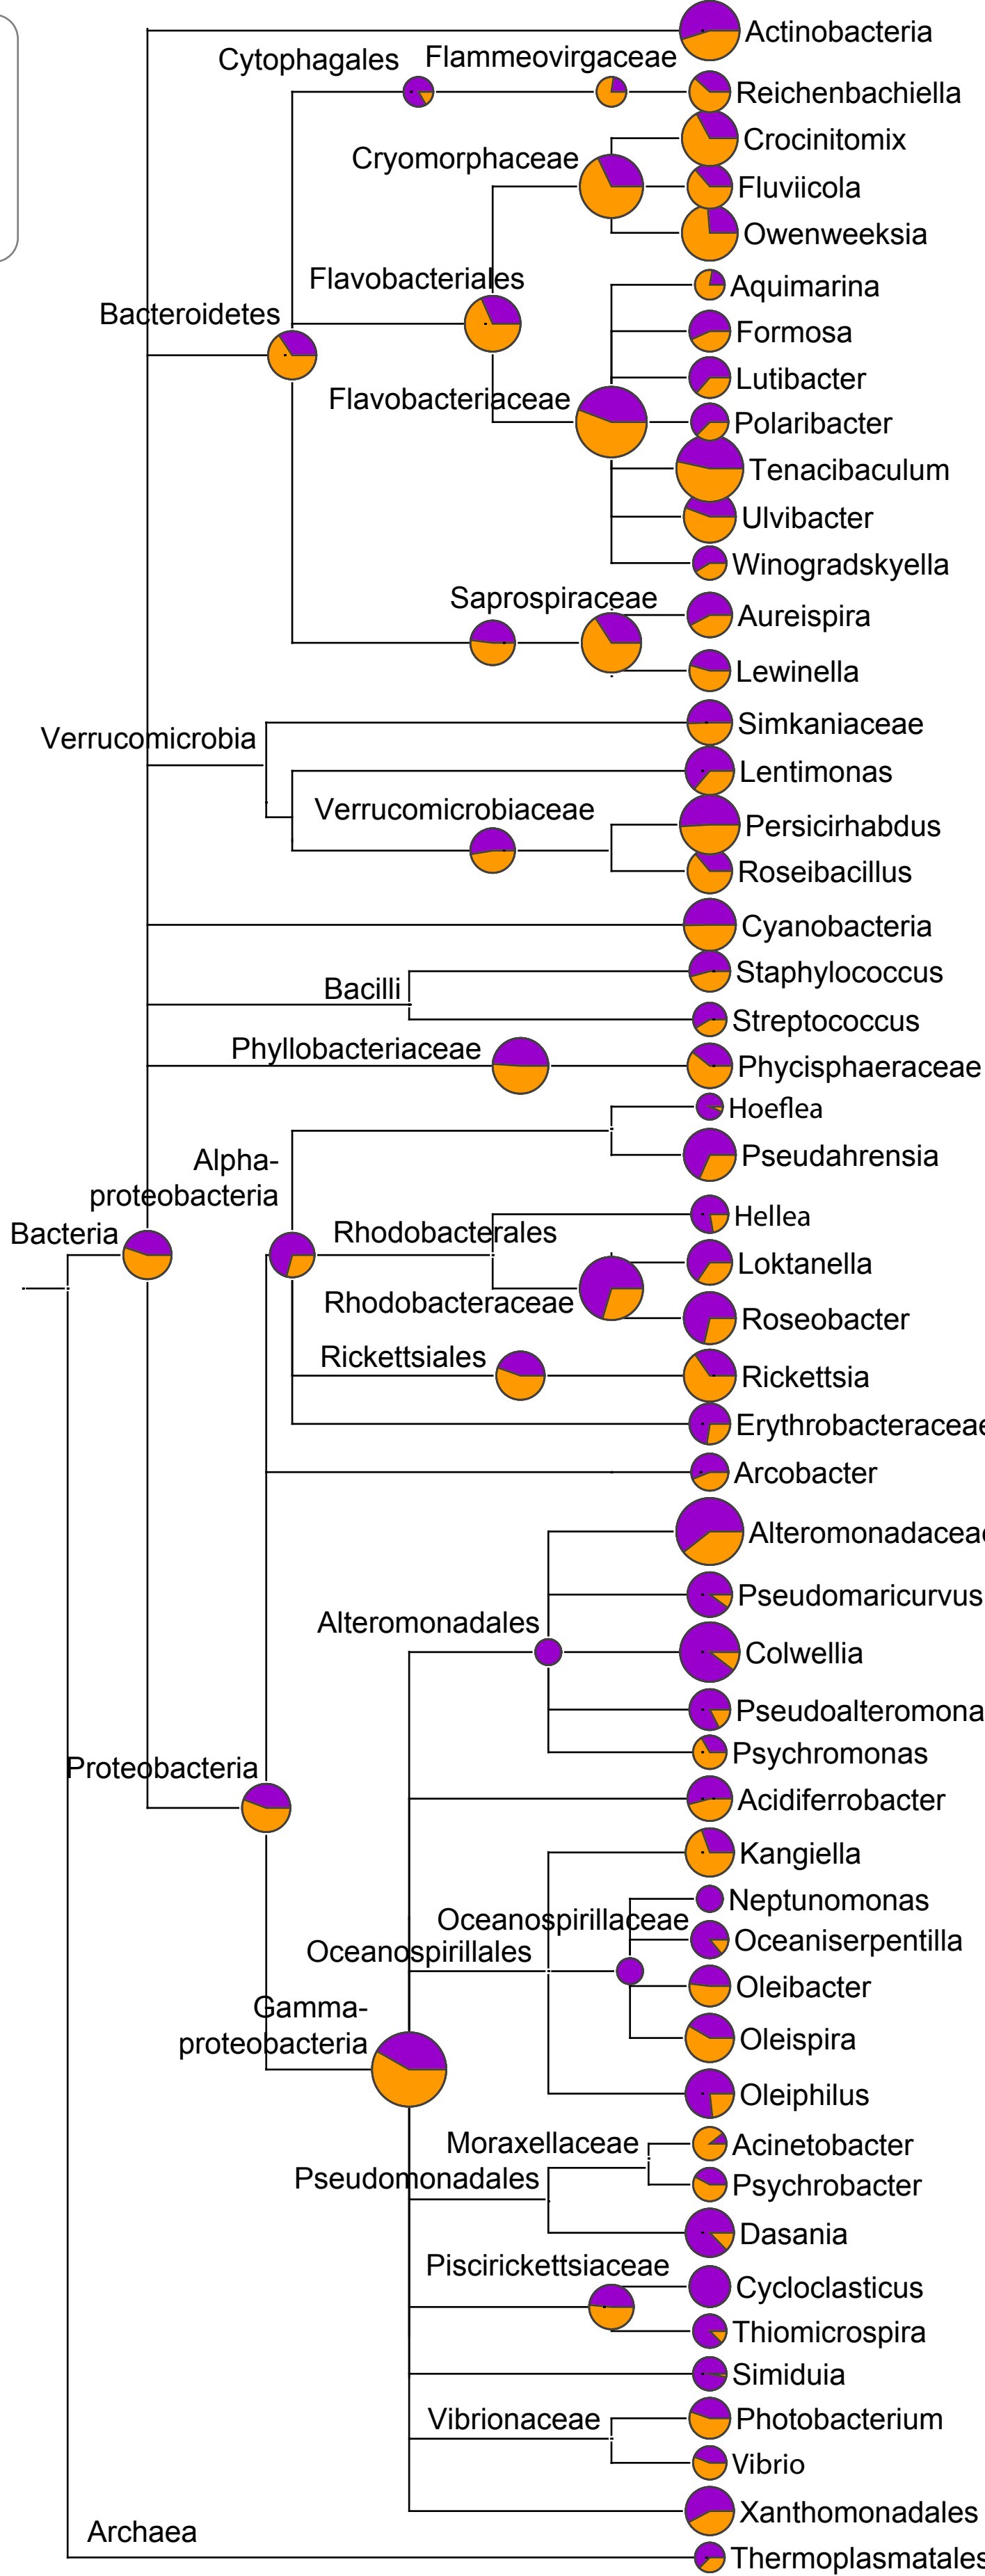

Supplement: pone.0159289.s002.pdf [file pone.0159289.s002.pdf]
