# Supplementary material for: Microbes on a Bottle: Substrate, Season and Geography Influence Community Composition of Microbes Colonizing Marine Plastic Debris
Source: PubMed Central journal article supplement (PMC4972250; doi:10.1371/journal.pone.0159289), 2016-08-03

(a)

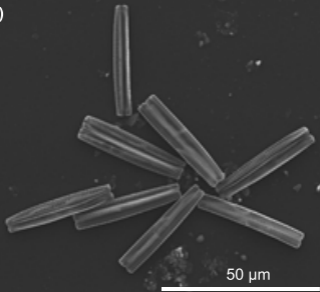

(b)

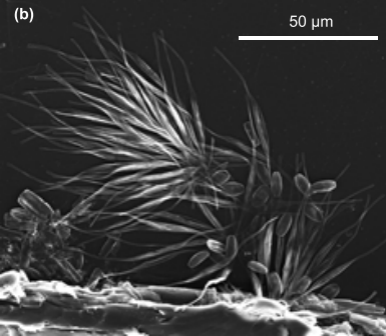

Supplement: pone.0159289.s003.pdf [file pone.0159289.s003.pdf]
